# Supplementary material for: Anti-inflammatory and wound healing activities of calophyllolide isolated from Calophyllum inophyllum Linn
Source: PubMed Central journal article supplement (PMC5636079; doi:10.1371/journal.pone.0185674), 2017-10-11

S1 Fig. <sup>1</sup>H-NMR analysis of isolated calophyllolide (CP)

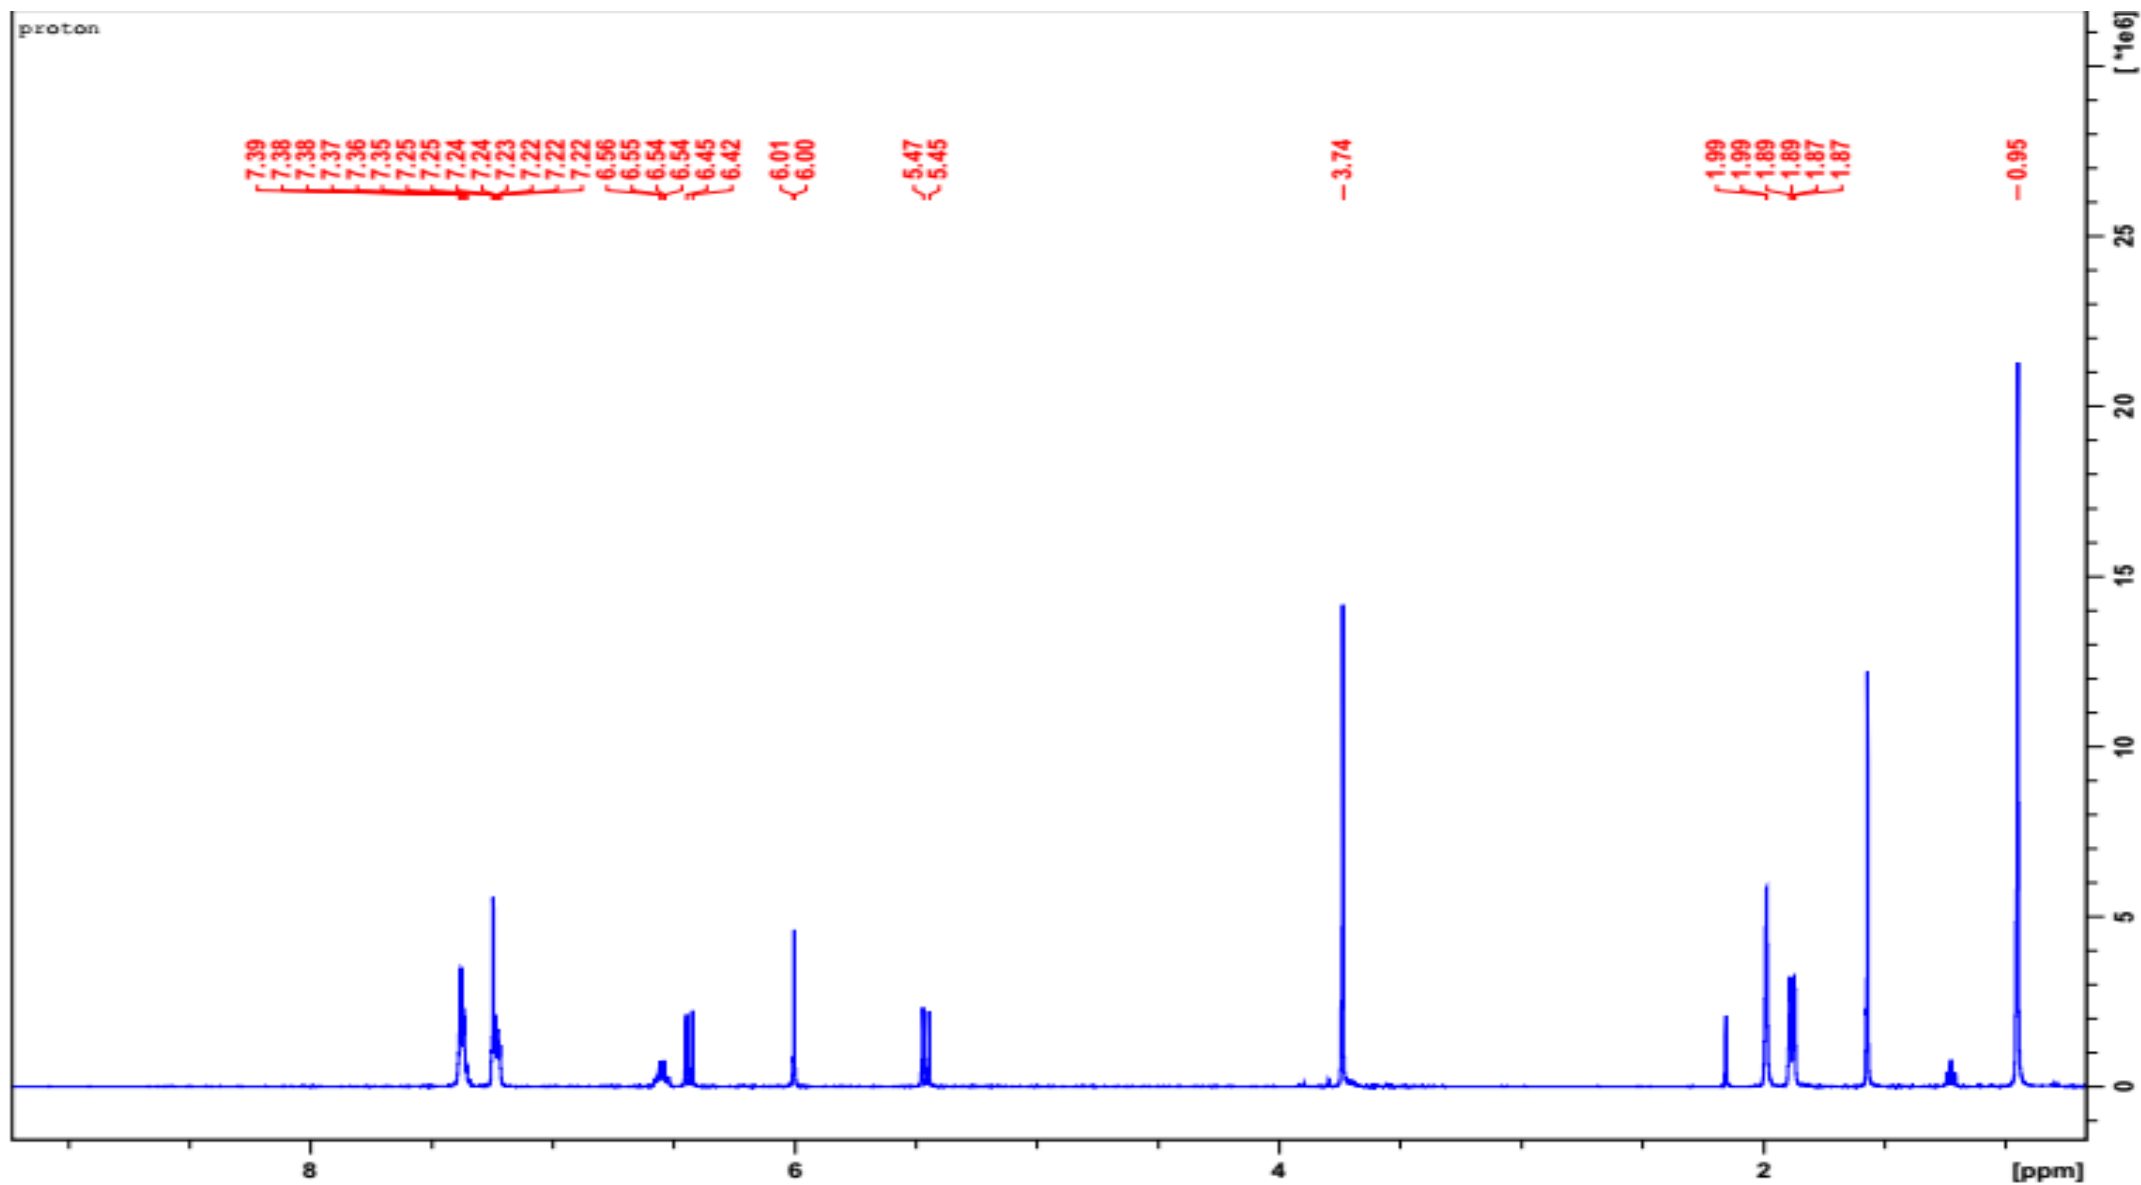

Supplement: pone.0185674.s001.pdf [file pone.0185674.s001.pdf]
