# Supplementary material for: Anti-inflammatory and wound healing activities of calophyllolide isolated from Calophyllum inophyllum Linn
Source: PubMed Central journal article supplement (PMC5636079; doi:10.1371/journal.pone.0185674), 2017-10-11

S2 Fig.  $^{13}\text{C}$ -NMR analysis of isolated calophyllolide (CP)

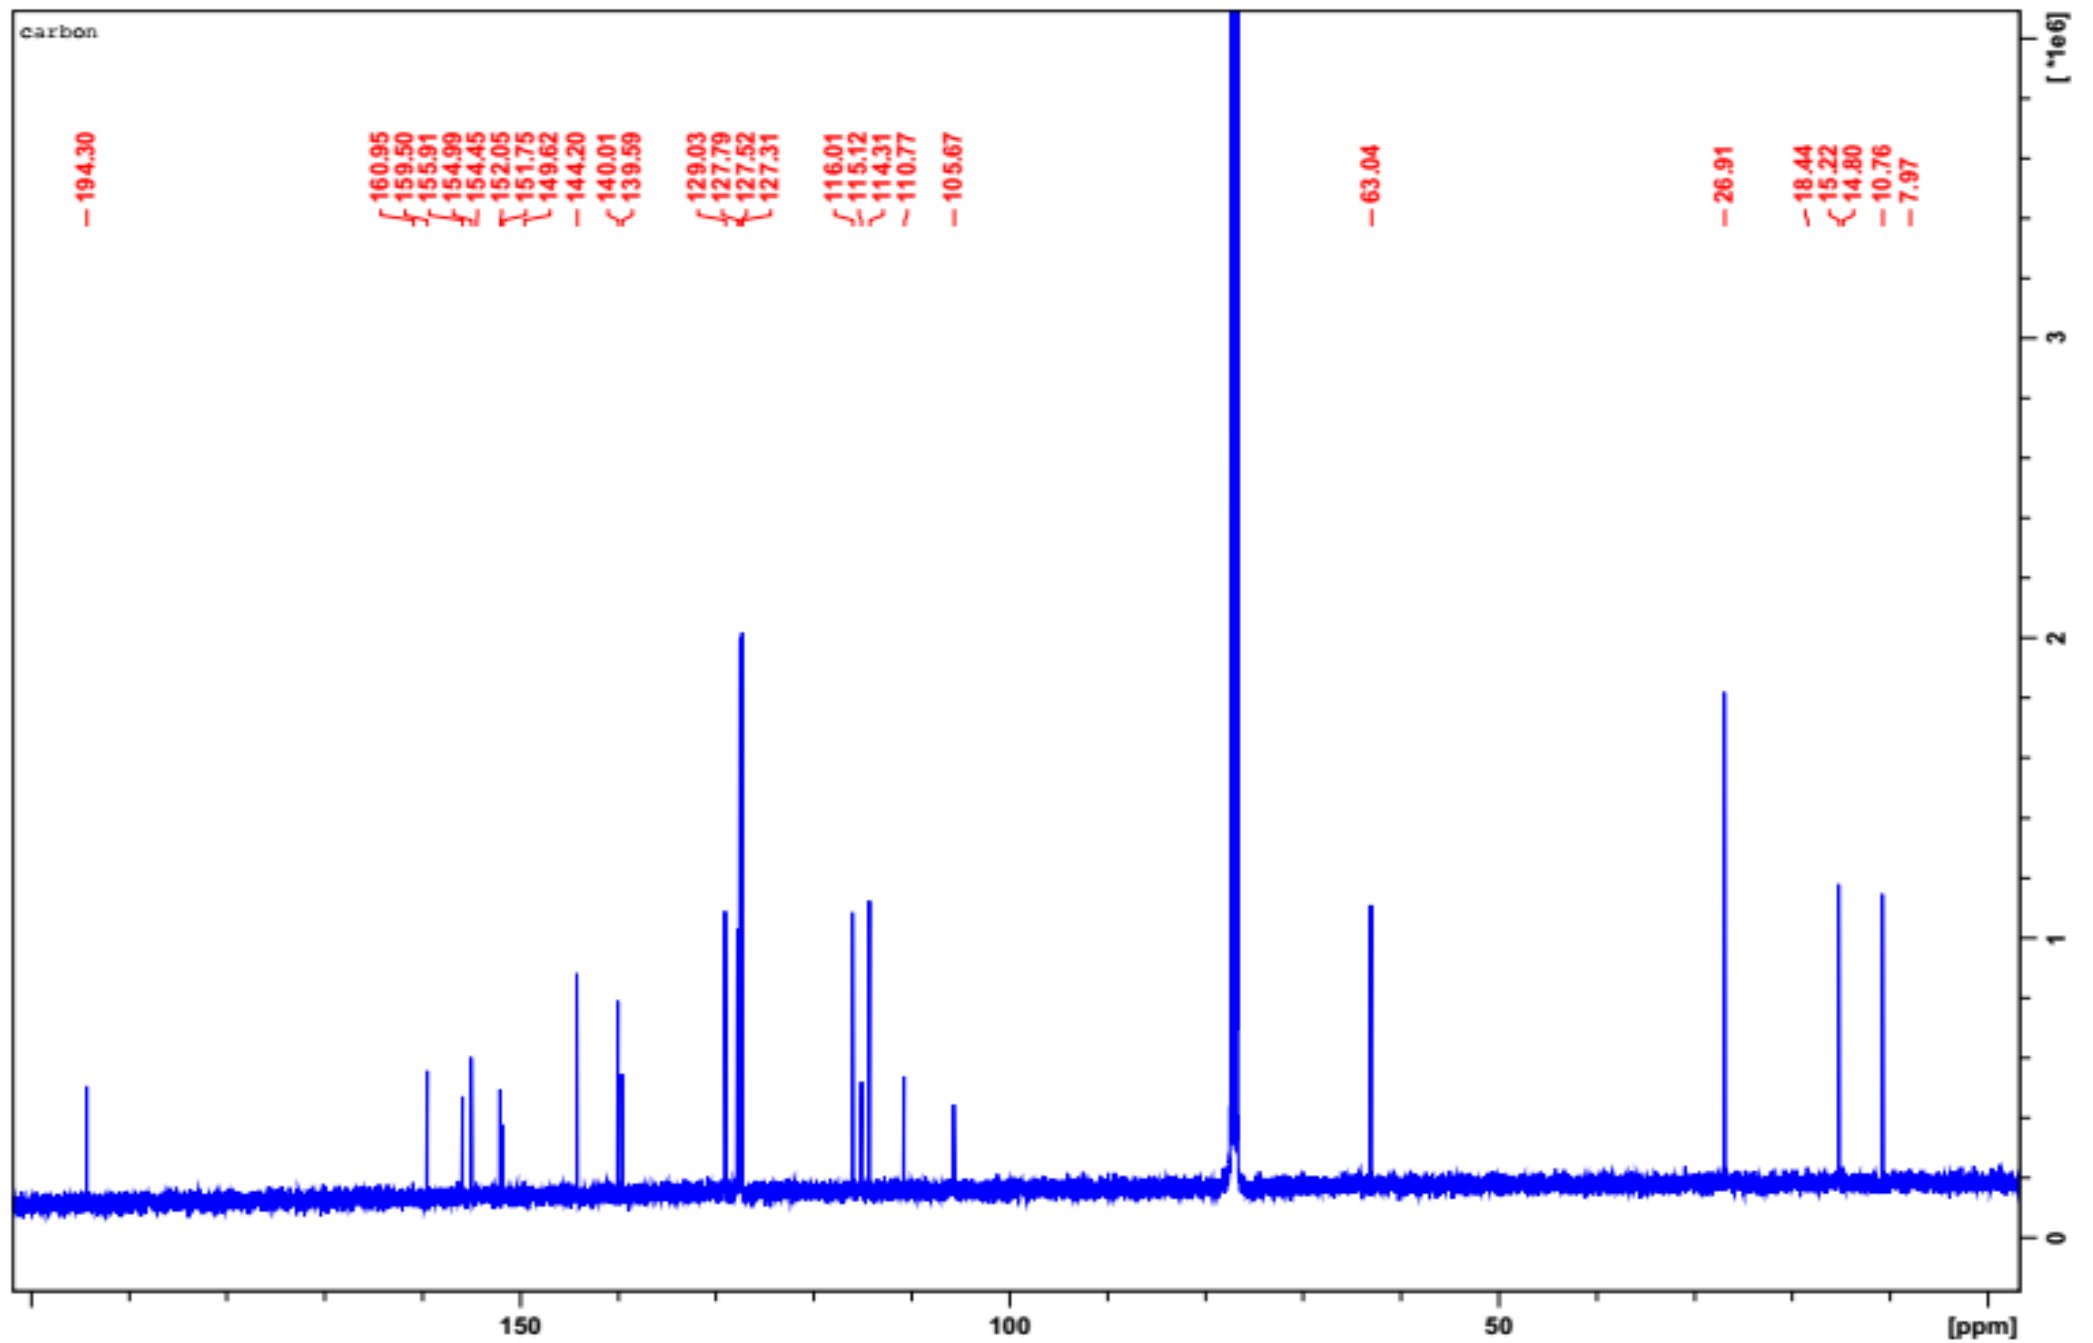

Supplement: pone.0185674.s002.pdf [file pone.0185674.s002.pdf]
