# Supplementary material for: Anti-inflammatory and wound healing activities of calophyllolide isolated from Calophyllum inophyllum Linn
Source: PubMed Central journal article supplement (PMC5636079; doi:10.1371/journal.pone.0185674), 2017-10-11

### S3 Fig. LC-MS analysis of isolated calophyllolide (CP)

170619\_Calo\_MeOH\_Icms 877 (26.652) Cm (875:884-(885:891+867:872))

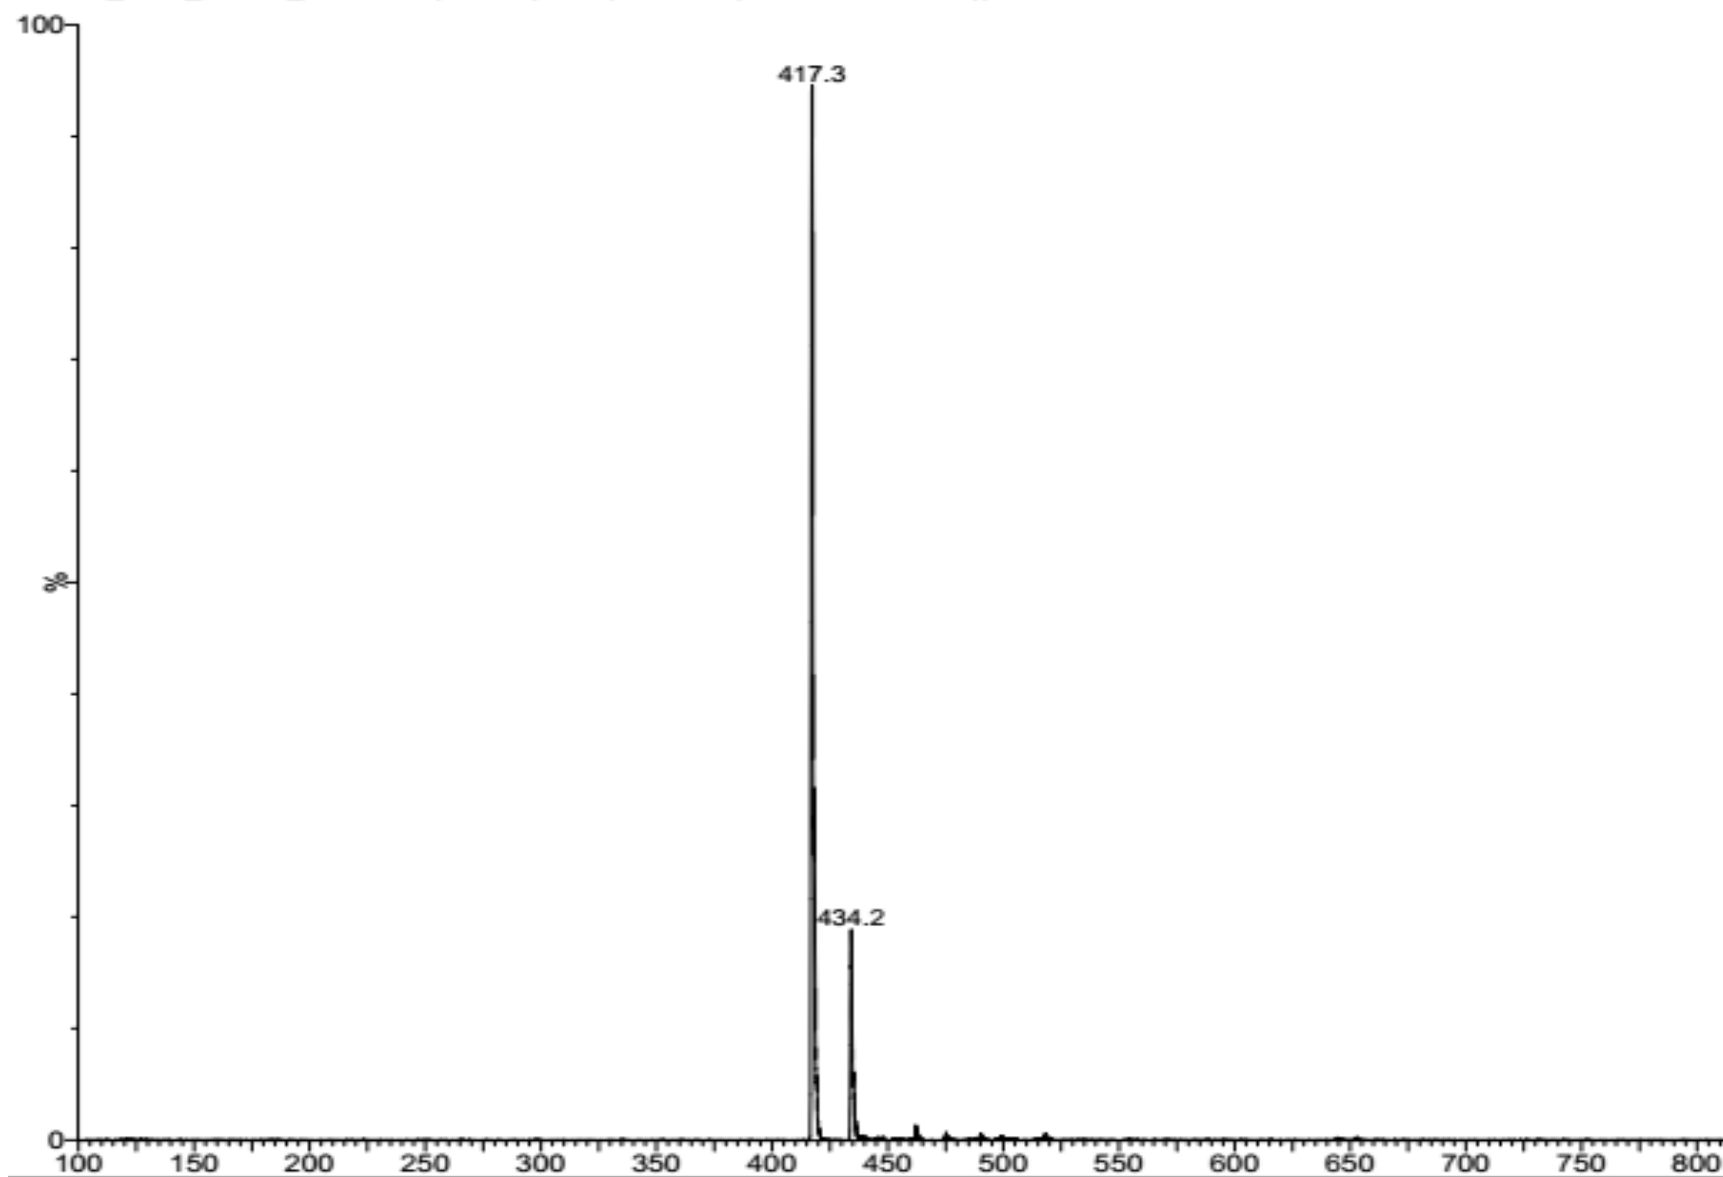

Supplement: pone.0185674.s003.pdf [file pone.0185674.s003.pdf]
