# Supplementary material for: Anti-inflammatory and wound healing activities of calophyllolide isolated from Calophyllum inophyllum Linn
Source: PubMed Central journal article supplement (PMC5636079; doi:10.1371/journal.pone.0185674), 2017-10-11
Supplement: pone.0185674.s005.pdf [file pone.0185674.s005.pdf]

**S1 Table. List of designed forward and reverse primers for M1/M2 macrophage-related genes/markers**

| <b>Name</b>    | <b>Gene Symbol</b> | <b>Forward primer</b>          | <b>Reverse primer</b>         | <b>Product (bp)</b> |
|----------------|--------------------|--------------------------------|-------------------------------|---------------------|
| <b>M1</b>      | CD14               | 5'-CTCAAACCTTCAGAATCTACC-3'    | 5'-GACTTGATAATATCACGCAACTG-3' | 276                 |
|                | CD127              | 5'-TCTGACCTGAAAGTCGTTTATCGC-3' | 5'-CATCCTCCTTGATTCTTGGGTTC-3' | 317                 |
| <b>M2</b>      | CD163              | 5'-AGCTGGTCAGGTCTGGAGTC -3'    | 5'-CCTGTCCTTCGGAACACGTC -3'   | 107                 |
|                | CD206              | 5'-CGTCACCCTGTATGCCTGTG-3'     | 5'-CCATCTGCTCCACAATCCCG-3'    | 163                 |
| <b>Control</b> | GAPDH              | 5'-CCAATGTGTCCGTCGTGGATC-3'    | 5'-GCTTCACCACCTTCTTGATGTC-3'  | 162                 |
