# Supplementary material for: Anti-inflammatory and wound healing activities of calophyllolide isolated from Calophyllum inophyllum Linn
Source: PubMed Central journal article supplement (PMC5636079; doi:10.1371/journal.pone.0185674), 2017-10-11
Supplement: pone.0185674.s006.pdf [file pone.0185674.s006.pdf]

**S2 Table. The values of body weight and spleen from normal-, vehicle-, PI-, and CP- treated group measured at day 7 and day 14**

| <b>Parameter</b>  | <b>Mouse group</b> | <b>Day</b> | <b>Mean</b> | <b>SD</b> | <b>P-value</b> |        |
|-------------------|--------------------|------------|-------------|-----------|----------------|--------|
| Body weight (g)   | Normal             | 7          | 30.50       | 1.229     | 0.6524         |        |
|                   |                    | 14         | 38.48       | 1.337     | 0.4583         |        |
|                   | Vehicle            | 7          | 31.37       | 1.305     | 0.6524         |        |
|                   |                    | 14         | 37.66       | 1.228     | 0.4583         |        |
|                   | PI                 | 7          | 29.83       | 2.098     | 0.6524         |        |
|                   |                    | 14         | 37.10       | 1.439     | 0.4583         |        |
|                   | CP                 | 7          | 30.30       | 1.054     | 0.6524         |        |
|                   |                    | 14         | 37.78       | 1.305     | 0.4583         |        |
|                   | Spleen length (cm) | Normal     | 7           | 1.417     | 0.1060         | 0.0001 |
|                   |                    |            | 14          | 1.282     | 0.04324        | 0.0001 |
|                   |                    | Vehicle    | 7           | 2.857     | 0.08145        | 0.0001 |
|                   |                    |            | 14          | 2.352     | 0.1585         | 0.0001 |
| PI                |                    | 7          | 2.273       | 0.1365    | 0.0001         |        |
|                   |                    | 14         | 2.076       | 0.1234    | 0.0001         |        |
| CP                |                    | 7          | 1.573       | 0.06807   | 0.0001         |        |
|                   |                    | 14         | 1.304       | 0.07092   | 0.0001         |        |
| Spleen weight (g) |                    | Normal     | 7           | 0.1877    | 0.01943        | 0.0001 |
|                   |                    |            | 14          | 0.2240    | 0.04615        | 0.0080 |
|                   |                    | Vehicle    | 7           | 0.5167    | 0.05750        | 0.0001 |
|                   |                    |            | 14          | 0.3500    | 0.04472        | 0.0080 |
|                   | PI                 | 7          | 0.3090      | 0.01744   | 0.0001         |        |
|                   |                    | 14         | 0.2880      | 0.05933   | 0.0080         |        |
|                   | CP                 | 7          | 0.2050      | 0.03969   | 0.0001         |        |
|                   |                    | 14         | 0.2340      | 0.06580   | 0.0080         |        |
|                   | Spleen index       | Normal     | 7           | 0.006166  | 0.0007753      | 0.0001 |
|                   |                    |            | 14          | 0.005822  | 0.001179       | 0.0070 |

|  |         |    |          |          |        |
|--|---------|----|----------|----------|--------|
|  | Vehicle | 7  | 0.01654  | 0.002529 | 0.0001 |
|  |         | 14 | 0.009308 | 0.001284 | 0.0070 |
|  | PI      | 7  | 0.01042  | 0.001252 | 0.0001 |
|  |         | 14 | 0.007777 | 0.001652 | 0.0070 |
|  | CP      | 7  | 0.006743 | 0.001085 | 0.0001 |
|  |         | 14 | 0.006200 | 0.001742 | 0.0070 |
